# Supplementary material for: Lithium metal protected by atomic layer deposition metal oxide for high performance anodes
Source: Royal Society of Chemistry journal article supplement (doi:10.1039/c7ta03116e), 2017-01-01
Supplement: c7ta03116e1.pdf [file c7ta03116e1.pdf]

**Supporting Information:**  
**Lithium Metal Protected by Atomic Layer Deposition Metal Oxide**  
**for High Performance Anodes**

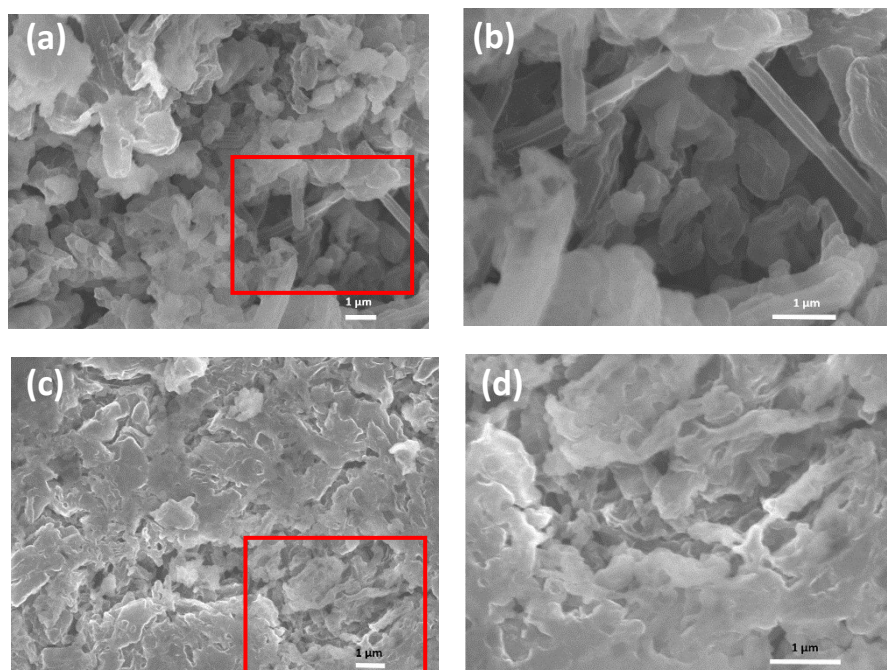

Figure S1. SEM images of Li surface in symmetric cell after 50 charge-discharge cycles. (a) Pristine Li (9,000 magnification). (b) Magnified view of region in red box in Figure S1a (20,000 magnification). (c) 4nm Al<sub>2</sub>O<sub>3</sub> coated Li (9,000 magnification). (d) Magnified view of region in red box in Figure S1c (20,000 magnification).

Table S1: Atomic composition of Li coated with 10 and 20 ALD Al<sub>2</sub>O<sub>3</sub> cycles prior to electrochemical cycling as measured by XPS.

| Species | Concentration (at%)                  |                                      |
|---------|--------------------------------------|--------------------------------------|
|         | 10×Al <sub>2</sub> O <sub>3</sub> Li | 20×Al <sub>2</sub> O <sub>3</sub> Li |
| Al      | 2.1                                  | 2.9                                  |
| Li      | 44.0                                 | 41.7                                 |
| O       | 39.2                                 | 35.3                                 |
| C       | 14.5                                 | 19.5                                 |
| F       | 0.1                                  | 0.6                                  |

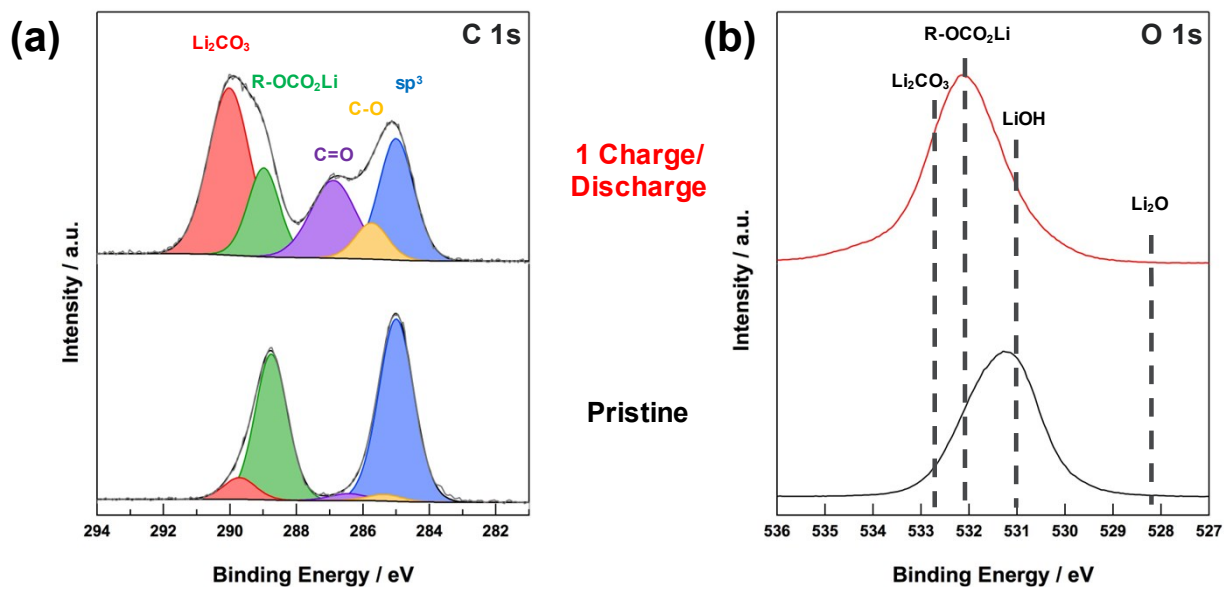

Figure S2. High-resolution XPS spectra for the (a) C 1s and (b) O 1s core levels. The bottom spectra show the surface speciation for the pristine ALD-coated Li (20xAl<sub>2</sub>O<sub>3</sub>), and the top spectra show the change in surface speciation after one discharge-charge cycle.

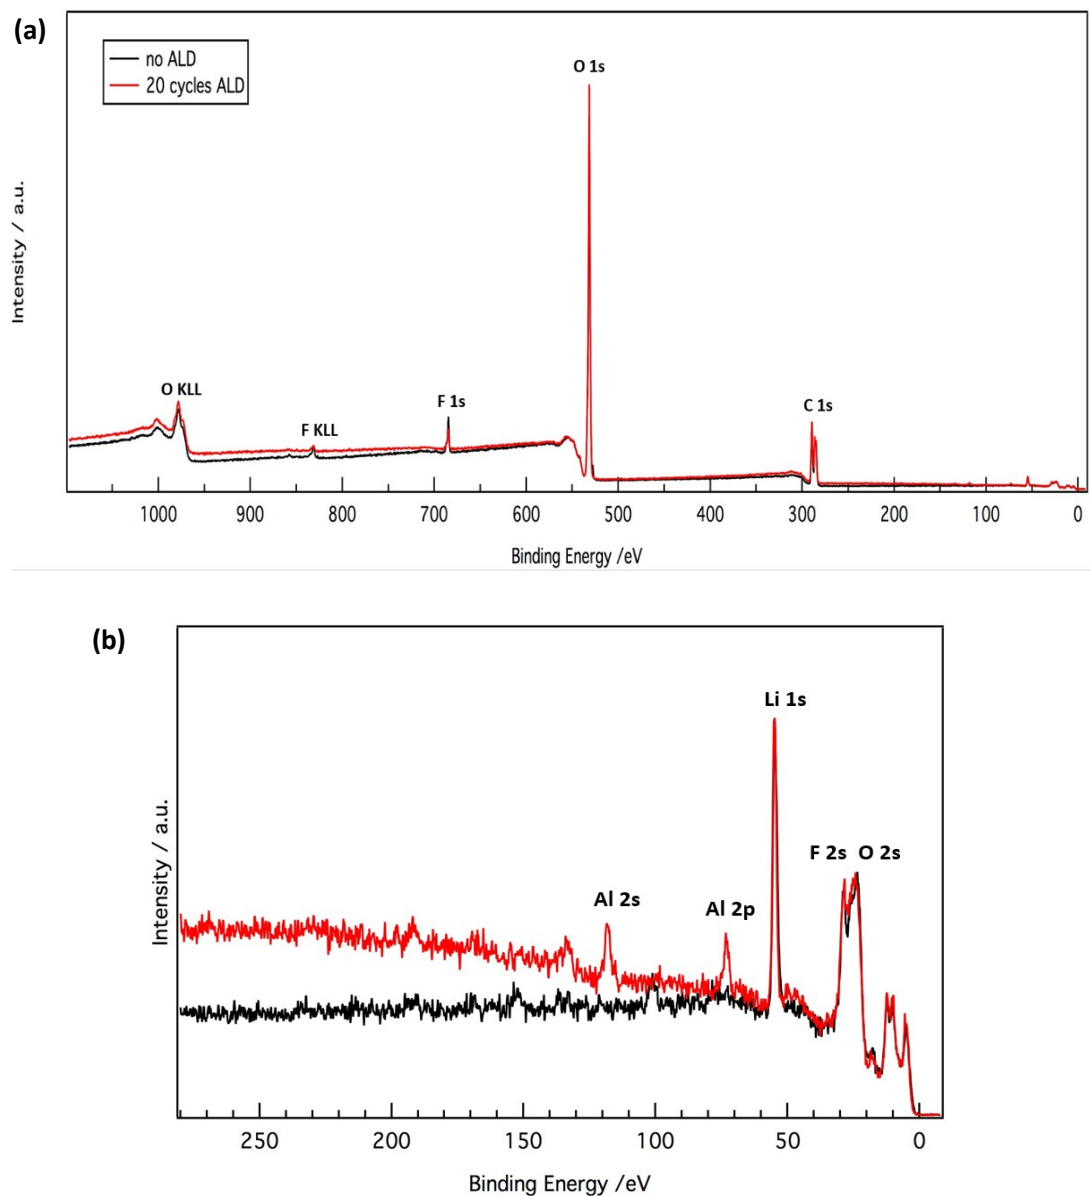

Figure S3. XPS spectra of bare Li and 20×Al<sub>2</sub>O<sub>3</sub> Li after 10 stripping/plating cycles. Signals taken from the center of the electrodes. (a) In the range of 0-1100 eV after 10 stripping/plating cycles. (b) In the range of 0-280 eV after 10 stripping/plating cycles.

Table S2 Elemental concentration for uncoated Li and 20  $\times$  Al<sub>2</sub>O<sub>3</sub> coated Li after 10 discharge-charge cycles by XPS

| Species | Concentration (at%) |                                               |
|---------|---------------------|-----------------------------------------------|
|         | Uncoated Li         | 20 $\times$ Al <sub>2</sub> O <sub>3</sub> Li |
| Al      | 0.0                 | 1.1                                           |
| Li      | 36.6                | 31.4                                          |
| O       | 34.9                | 36.3                                          |
| C       | 26.7                | 30.1                                          |
| F       | 1.7                 | 1.1                                           |

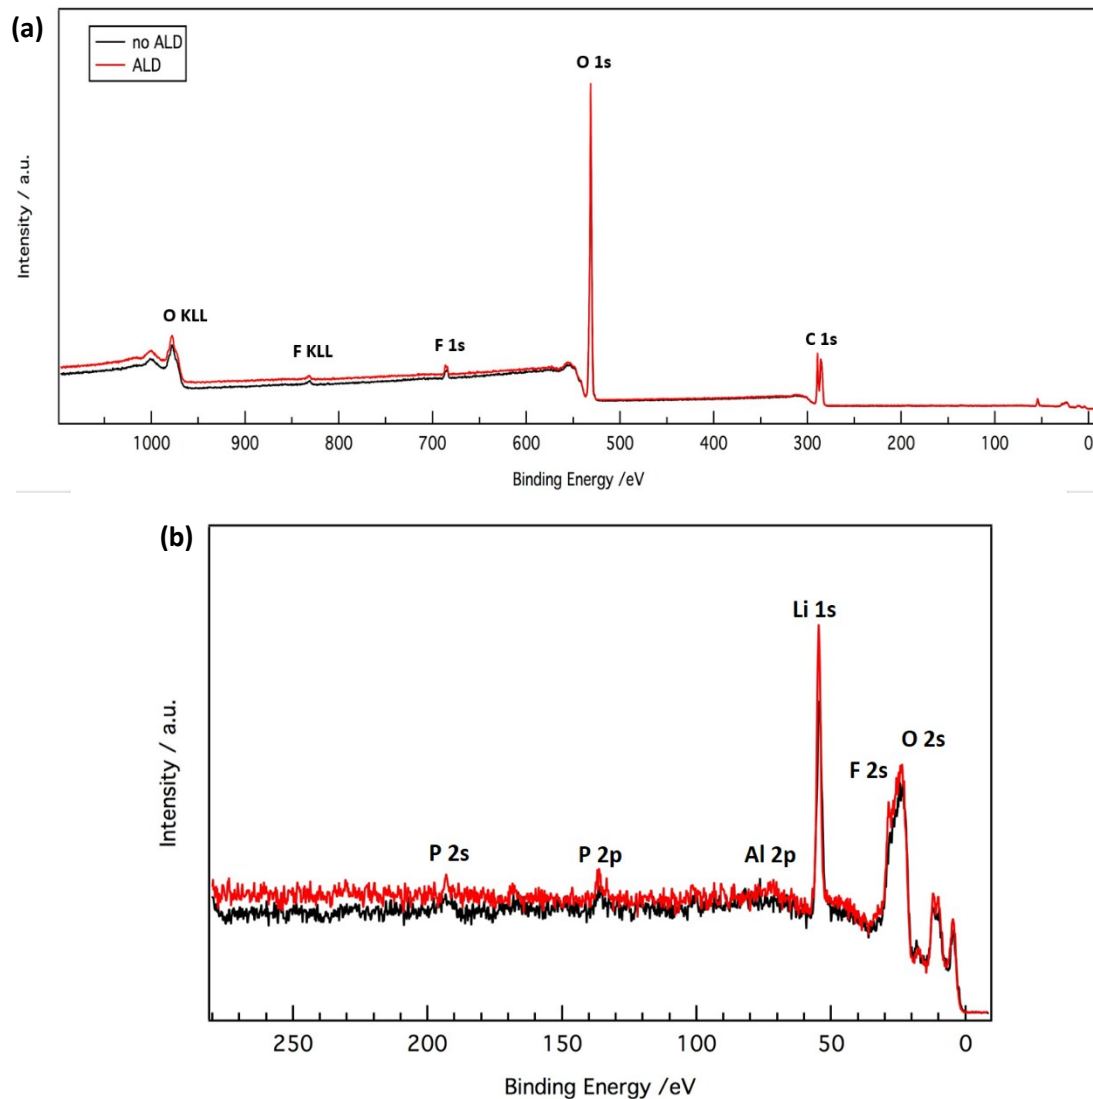

Figure S4. XPS of bare Li and 20 $\times$ Al<sub>2</sub>O<sub>3</sub> Li after 50 stripping/plating cycles. Signals taken from the center of the electrodes in the range of: (a) 0-1100 eV after 50 stripping/plating cycles; (b) 0-280 eV after 50 stripping/plating cycles.

Table S3 Concentration of elements for uncoated Li and  $20 \times \text{Al}_2\text{O}_3$  coated Li after 50 discharge-charge cycles by XPS

| Species | Concentration (at%) |                                      |
|---------|---------------------|--------------------------------------|
|         | Uncoated Li         | $20 \times \text{Al}_2\text{O}_3$ Li |
| Al      | 0.0                 | 0.0                                  |
| Li      | 32.0                | 31.2                                 |
| O       | 35.7                | 36.8                                 |
| C       | 31.1                | 30.9                                 |
| F       | 1.1                 | 0.9                                  |

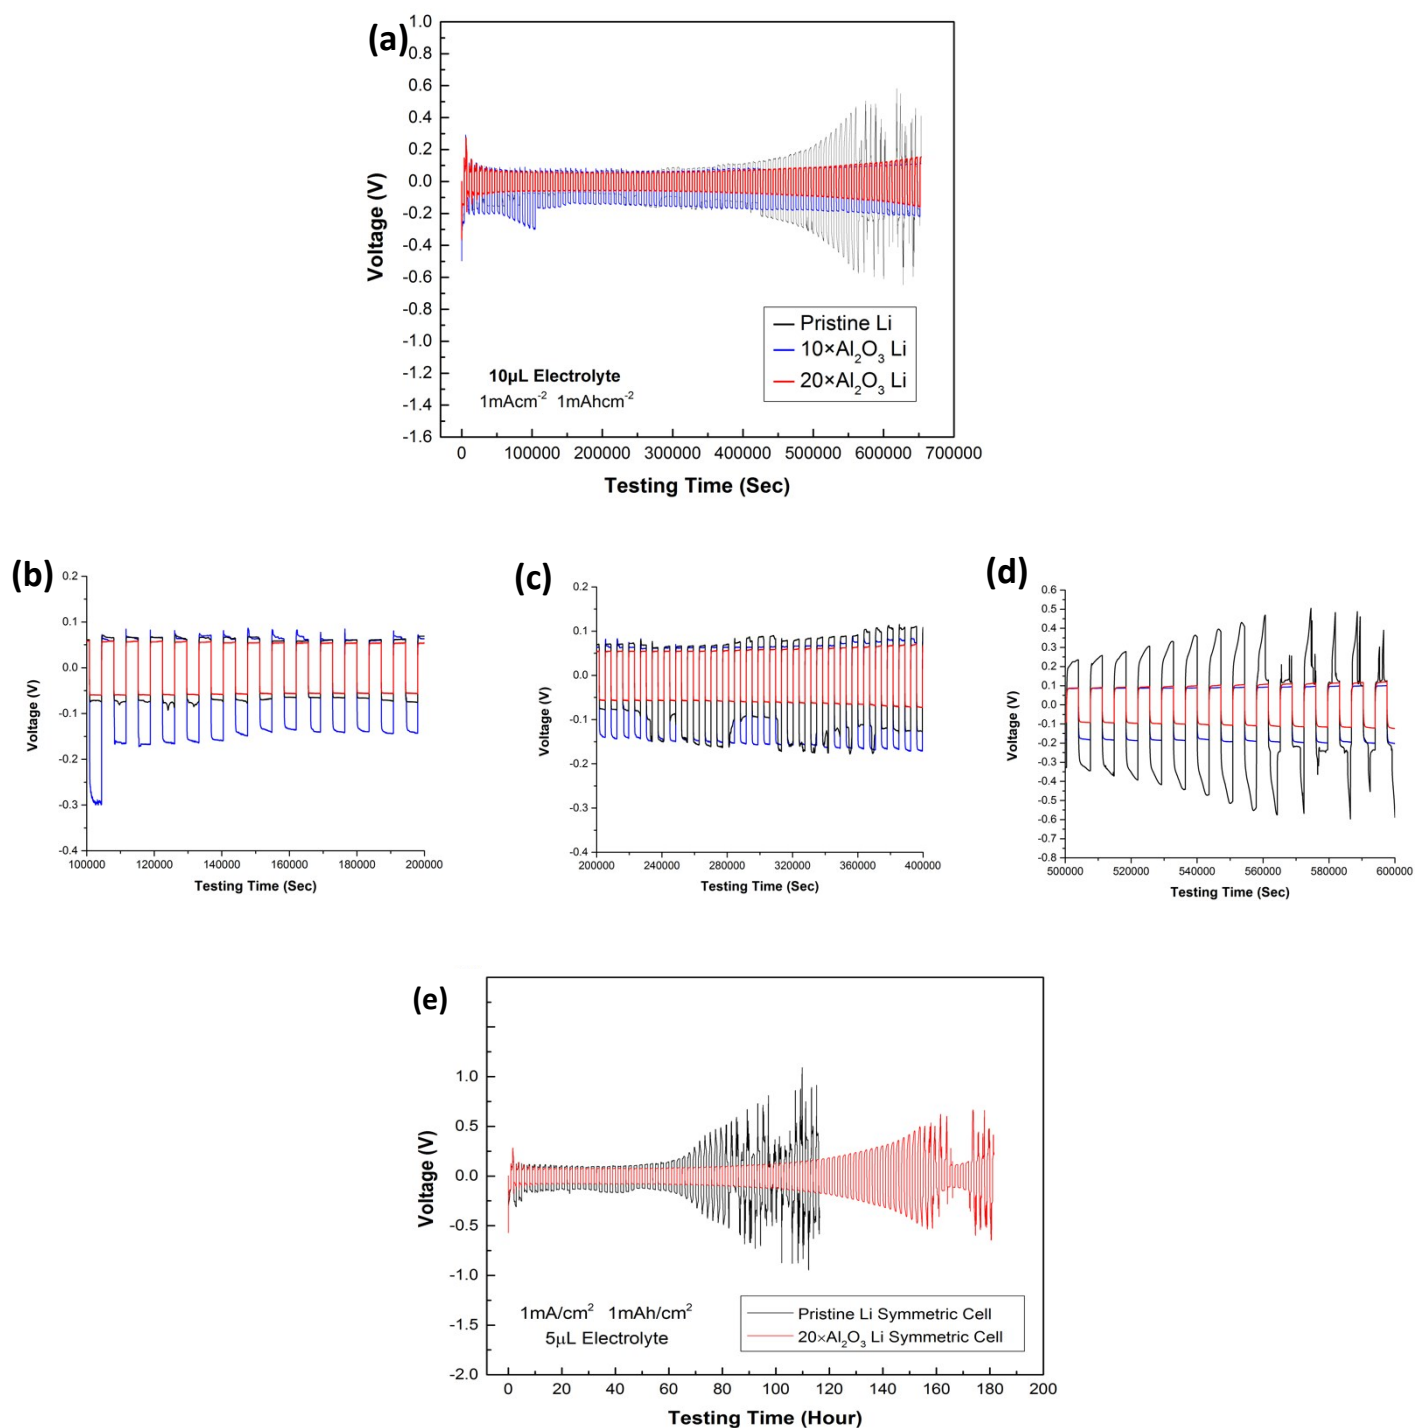

Figure S5. (a) Symmetric cell tests in 10  $\mu\text{L}$  carbonate electrolyte at current density of  $1 \text{ mA/cm}^2$  with capacity of  $1 \text{ mAh/cm}^2$ . (b-d) Detailed voltage profile in different time range. (e) Symmetric cell tests using 5  $\mu\text{L}$  carbonate electrolyte at current density of  $1 \text{ mA/cm}^2$  with capacity of  $1 \text{ mAh/cm}^2$ .



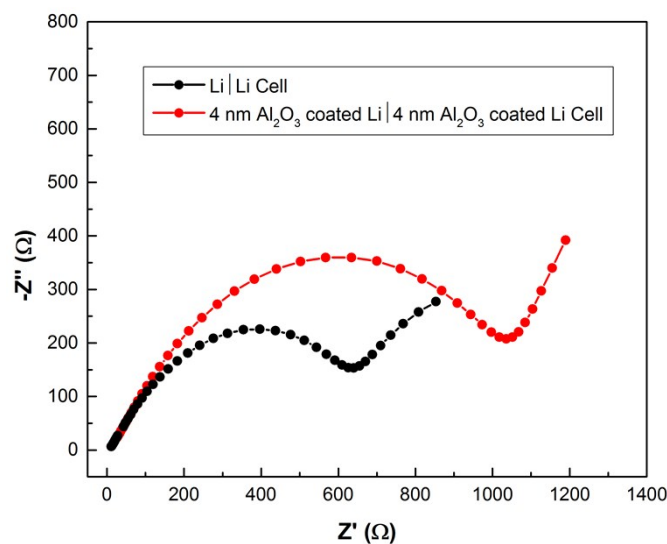

Figure S6. EIS of symmetric cells with 5  $\mu\text{L}$  carbonate electrolyte before cycling (fresh cells).

**Fitting EIS data:** the slope of the incline line at low frequency is the Warburg coefficient ( $\sigma$ ). The smaller of Warburg coefficient value, the steeper of the slope.<sup>1</sup> The coefficient can be expressed below,<sup>2</sup>

$$\sigma = \frac{RT}{\sqrt{2D_{\text{Li}}}n^2F^2SC}$$

where  $R$  is the ideal gas constant,  $T$  is the thermodynamic temperature,  $F$  is the Faraday constant,  $n$  is the valence,  $D_{\text{Li}}$  is the diffusion coefficient of the  $\text{Li}$  ions in the cathode,  $C$  is the concentration of the  $\text{Li}^+$  ions and  $S$  denotes the contacting area between the active material particles and the electrolyte. The slope of the uncoated  $\text{Li-Cu}$  is smaller than the  $\text{Al}_2\text{O}_3$  coated  $\text{Li-Cu}$  cells, which means that the  $\sigma$  for uncoated  $\text{Li}$  is smaller, thus lithium ion conductivity is better with a larger  $D_{\text{Li}}$ .

**Calculation of Li thickness:** the amount of Li stripped and plated when a Li/Li symmetric cell is discharged and charged at 1 mA/cm<sup>2</sup> to a capacity of 1 mAh/cm<sup>2</sup>

In the discharge process, the amount of Li stripped from the anode is

$$\frac{1mAh/cm^2 * 6.94g/mol * 6.24e18/Coul * 3.6Coul/mAh}{0.53g/cm^3 * 6.022e23/mol} = 4.88\mu m$$

In the charge process, the amount of Li plated back to the anode side is also:

$$\frac{1mAh/cm^2 * 6.94g/mol * 6.24e18/Coul * 3.6Coul/mAh}{0.53g/cm^3 * 6.022e23/mol} = 4.88\mu m$$

Therefore, Li moved in the discharge and the charge process is both ~5 μm.

## References

1. G. Zhou, D.-W. Wang, L.-C. Yin, N. Li, F. Li and H.-M. Cheng, *ACS Nano*, 2012, **6**, 3214-3223.
2. N. Takami, A. Satoh, M. Hara and T. Ohsaki, *J. Electrochem. Soc.*, 1995, **142**, 371-379.
